# Supplementary material
Source: PubMed Central journal article supplement (PMC7745711)
Supplement: NIHMS1626633-supplement-1.pdf [file NIHMS1626633-supplement-1.pdf]

**Table S1.** Unadjusted S-EDE-Q global and subscale scores across groups

|                            | <b>Group A:<br/>Non-Vegetarians<br/>(n = 8,926)</b> | <b>Group B:<br/>Weight-Motivated<br/>Vegetarians<br/>(n = 413)</b> | <b>Group C:<br/>Non-Weight-Motivated<br/>Vegetarians<br/>(n = 555)</b> |
|----------------------------|-----------------------------------------------------|--------------------------------------------------------------------|------------------------------------------------------------------------|
|                            | <i>M (SE)</i>                                       |                                                                    |                                                                        |
| Global scale               | 2.05 (0.02)                                         | 2.91 (0.09)                                                        | 1.82 (0.07)                                                            |
| <i>Subscales</i>           |                                                     |                                                                    |                                                                        |
| Restraint                  | 2.00 (0.02)                                         | 3.05 (0.10)                                                        | 1.70 (0.08)                                                            |
| Shape/weight overvaluation | 1.85 (0.02)                                         | 2.73 (0.10)                                                        | 1.70 (0.08)                                                            |
| Body dissatisfaction       | 2.32 (0.02)                                         | 2.88 (0.10)                                                        | 2.11 (0.08)                                                            |

*Note.* S-EDE-Q = Short-Eating Disorder Examination-Questionnaire; *M* = mean; *SE* = standard error.

**Table S1.** Unadjusted S-EDE-Q global and subscale scores across groups

|                            | <b>Group A:<br/>Non-Vegetarians<br/>(<i>n</i> = 8,926)</b> | <b>Group B:<br/>Weight-Motivated<br/>Vegetarians<br/>(<i>n</i> = 413)</b> | <b>Group C:<br/>Non-Weight-Motivated<br/>Vegetarians<br/>(<i>n</i> = 555)</b> |
|----------------------------|------------------------------------------------------------|---------------------------------------------------------------------------|-------------------------------------------------------------------------------|
|                            | <i>M (SE)</i>                                              |                                                                           |                                                                               |
| Global scale               | 2.05 (0.02)                                                | 2.91 (0.09)                                                               | 1.82 (0.07)                                                                   |
| <i>Subscales</i>           |                                                            |                                                                           |                                                                               |
| Restraint                  | 2.00 (0.02)                                                | 3.05 (0.10)                                                               | 1.70 (0.08)                                                                   |
| Shape/weight overvaluation | 1.85 (0.02)                                                | 2.73 (0.10)                                                               | 1.70 (0.08)                                                                   |
| Body dissatisfaction       | 2.32 (0.02)                                                | 2.88 (0.10)                                                               | 2.11 (0.08)                                                                   |

*Note.* S-EDE-Q = Short-Eating Disorder Examination-Questionnaire; *M* = mean; *SE* = standard error.
